# Supplementary material for: Palatal development of preterm and low birthweight infants compared to term infants – What do we know? Part 1: The palate of the term newborn
Source: PubMed Central journal article supplement (PMC1308841; doi:10.1186/1746-160x-1-8), 2005-10-28
Supplement: 1746-160X-1-8-S2.pdf [file 1746-160X-1-8-S2.pdf]

Table 2. Nomenclature of palatal structures as presented in Figure 2.

| structure                   | Term                                                                                                                                         | Reference                           |
|-----------------------------|----------------------------------------------------------------------------------------------------------------------------------------------|-------------------------------------|
| <b>a</b>                    | Buccal vestibule                                                                                                                             | [49]                                |
|                             | Outer alveolar groove                                                                                                                        | Schwarz*                            |
|                             | Vestibular buccal vestibule                                                                                                                  | Schwarz*, [105]                     |
|                             | Lip groove, labial groove                                                                                                                    | [51]                                |
|                             | Labio- gingival groove                                                                                                                       | Norberg*                            |
|                             | Outer buccal margin                                                                                                                          | Freiband*                           |
|                             | Vestibular groove, bucco-marginal groove, labio-bucco-tectal groove, labio-tectal groove, labio-gingival groove                              | Bolk*                               |
| <b>b</b>                    | Alveo-palatinal sulcus                                                                                                                       | Ashley-Montagu*                     |
|                             | Dento-gingival groove                                                                                                                        | Bolk*, [105]                        |
| <b>b'</b>                   | Postero-lateral sulcus                                                                                                                       | Ashley-Montagu*                     |
| <b>b + b'</b>               | Tooth germ groove                                                                                                                            | [108], [49]                         |
|                             | Inner alveolar groove, dental groove                                                                                                         | [62], [54], [55], Schwarz*          |
|                             | Dental groove; dental and gingival grooves are divided by the incisal papilla into lateral halves [18]                                       | [50], [51]                          |
| <b>c</b>                    | Transitory palatal fold                                                                                                                      | [62], [55], Schwarz*                |
|                             | Transitory palatal groove                                                                                                                    | [31], [48], Bolk*                   |
| <b>d</b>                    | Anterior palatal groove                                                                                                                      | [105]                               |
|                             | Gingival groove                                                                                                                              | [108]                               |
| <b>c + d</b>                | Gingival groove (defines the inner alveolar margin; gingival and dental grooves are divided by the incisal papilla into lateral halves [18]) | [50], [51]                          |
| <b>e</b>                    | Lingual groove                                                                                                                               | Freiband *                          |
|                             | Anterior sulcus                                                                                                                              | Ashley-Montagu*                     |
|                             | Anterior groove                                                                                                                              | [108]                               |
| <b>f</b>                    | Antero-lateral sulcus                                                                                                                        | Ashley-Montagu*                     |
|                             | Antero-lateral groove                                                                                                                        | [108]                               |
| <b>g</b>                    | Lateral sulcus                                                                                                                               | Ashley-Montagu*                     |
|                             |                                                                                                                                              | [25]                                |
|                             | Bucco-tectal groove                                                                                                                          | Bolk*                               |
| <b>h</b>                    |                                                                                                                                              | [108]                               |
|                             | Frenulum labii superioris                                                                                                                    | [49]                                |
|                             | Frenulum tecto-labiale                                                                                                                       | Bolk*                               |
|                             | Frenulum labio-tectale                                                                                                                       | Norberg*                            |
|                             | Frenulum labiale                                                                                                                             | [105]                               |
|                             | Frenum labii                                                                                                                                 | [51]                                |
| <b>i</b>                    | Frenulum of cheek                                                                                                                            | [31]                                |
|                             | Frenulum laterale                                                                                                                            | [49], [105]                         |
| <b>p</b>                    | Papilla incisiva                                                                                                                             | [76], [31]                          |
| <b>1</b>                    | Alveolar wall/ -bulge                                                                                                                        | Schwarz*, [62], [108], [54], [105], |
|                             | Dental wall                                                                                                                                  | Bolk*                               |
|                             | Palatal wall                                                                                                                                 | Gegenbaur*                          |
| <b>2</b>                    | Tektal wall                                                                                                                                  | Bolk*, [105]                        |
| <b>p + 2 + 4</b>            | Tektal wall                                                                                                                                  | [55]                                |
|                             | <b>3</b>                                                                                                                                     | Pseudo alveolar wall                |
| <b>4</b>                    | Dental molar wall                                                                                                                            | [105]                               |
|                             | Alveolar wall                                                                                                                                | Retzius*                            |
|                             |                                                                                                                                              | Gegenbaur*                          |
| <b>4</b>                    | Tektal bulge                                                                                                                                 | Schwarz*, [54], [105]               |
|                             | Lateral palatine ridge                                                                                                                       | [52]                                |
|                             | Lateral palatine shelve                                                                                                                      | [107]                               |
|                             | Lateral alveolar ridge                                                                                                                       | [102]                               |
|                             | Lateral palatine prominences, Lateral palatine processes                                                                                     | [107]                               |
| <b>2 + 4</b>                | Tektal wall                                                                                                                                  | [108]                               |
| <b>5</b>                    | Palatal vault                                                                                                                                | [105]                               |
| <b>vestibular part of 1</b> | Vestibular germ bulge                                                                                                                        | Schwarz*                            |
|                             | <b>1 + 3</b>                                                                                                                                 | Border bulge                        |
| Border area, ona marginalis |                                                                                                                                              | Bolk*                               |
| <b>4 + 5</b>                | Gingival ridge                                                                                                                               | [85]                                |
|                             | Tegmen pris                                                                                                                                  | Bolk*                               |

\*Taken from [49]; no source given in the bibliography [49].
